# Supplementary material for: HAL-2 Promotes Homologous Pairing during Caenorhabditis elegans Meiosis by Antagonizing Inhibitory Effects of Synaptonemal Complex Precursors
Source: PubMed Central journal article supplement (PMC3415444; doi:10.1371/journal.pgen.1002880), 2012-08-09

*hal-2*

HIM-8 LMN-1

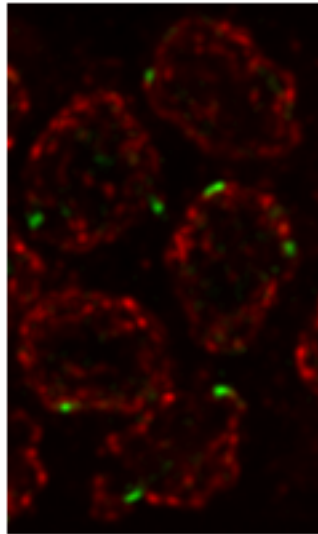

HIM-8 LMN-1  
DNA

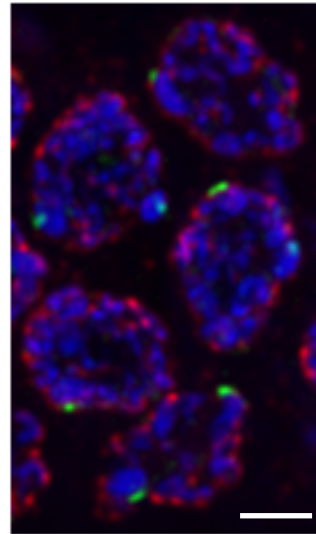

Supplement: pgen.1002880.s002.pdf [file pgen.1002880.s002.pdf]
