# Supplementary material for: HAL-2 Promotes Homologous Pairing during Caenorhabditis elegans Meiosis by Antagonizing Inhibitory Effects of Synaptonemal Complex Precursors
Source: PubMed Central journal article supplement (PMC3415444; doi:10.1371/journal.pgen.1002880), 2012-08-09

DNA SUN-1 S8-Pi

*syp-3; hal-2*

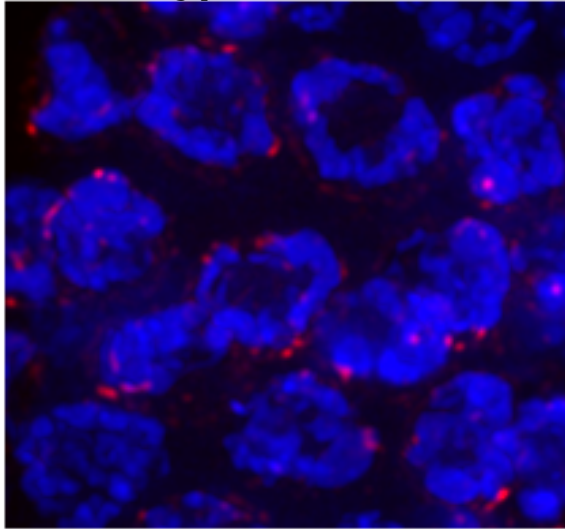

*syp-3; hal-2; chk-2*

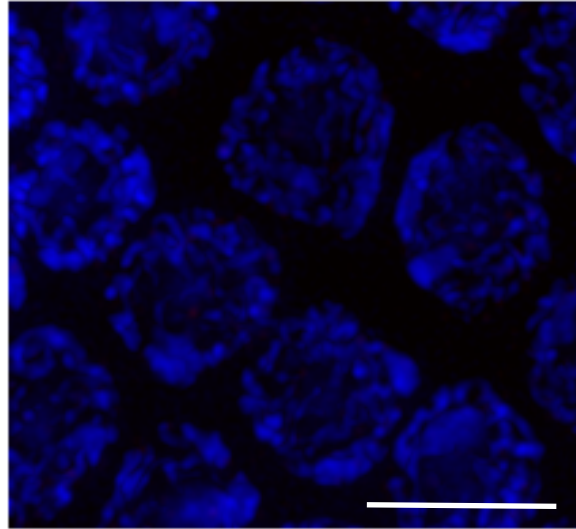

Supplement: pgen.1002880.s006.pdf [file pgen.1002880.s006.pdf]
