# Supplementary material for: HAL-2 Promotes Homologous Pairing during Caenorhabditis elegans Meiosis by Antagonizing Inhibitory Effects of Synaptonemal Complex Precursors
Source: PubMed Central journal article supplement (PMC3415444; doi:10.1371/journal.pgen.1002880), 2012-08-09
Supplement: pgen.1002880.s008.pdf [file pgen.1002880.s008.pdf]

# A

>T16H12.11 corrected coding sequence

```
gtcaatTTTTgtacaatttagATGAACACACCGGTAAAAGCAAACGGCAAAGGCAGCAAATGCCAGGAA
CTCCGATACCCATGGGTTCGGCAAACGCACAGGGCACATTCGCCTCTGGTTTCTACACTCCTCACGTCTC
AAAATTGAAGACAAACTATGACAGAGAGTTTCAAAGTTTCTTCGATCTGCCAAAACCGCAATCGATCAC
TTGGATAAGATTGAAATGCAAATACTTTGCCCGCTGAAAAAGAAGATAAAAACGTTTTTACAAGGAATCCA
ACACTCTCGATGTCTACTTCAGGTCACAAACATATTGGAGATCCTTCTACAAAGAGCTTATGAACCGCAG
CGATGATGTCATGGATTGCTTTCGATTTCGAGGATCTCCGTGACGTTGCTGCAGTTGTTGAGAGTCATCGA
TTGCCGGATGTGTTGGTTTCATTTGTCACGCAGCAGTTGATGGAATGGAGAGAATTGTTCAAAGACGTCG
AGTGGATGCGAAAGTTTTCGTGAATTGAGCCACAATATGGATTCTTTGAAAACGAAAAGAATTGAGCATGT
GCTGCGACAAGACATCATCAGGGAGATTGGTGTAGCCATCGATGTGCACAATCTGAAAATCGATGATTTT
AGAAGTCACAGCAATAACACGGAACGGGTTCGCGGAAGGAATTGCTCATGCCATTGAAGAGTCCAAGAATA
AACAAAGATGCTGGGAATCAGTTGAAGCATGTTCCCTGTGTTATCCAAGCAGATGAGTGTTTCGACGATGGTA
TCGAGAACACTATGGTGACCCGCAAGCTTTGTGATGAATCAGATGAAGAATCCTTGTCTGATGGTGAC
AATTCGTCTCTTTTTTGTGGCACGGCAGATTCAAGCAGTCGTGACGCTAGTGACATATCGACGGAAGAAG
TGGTCACCGAAAACGAATTCGACGAATTCCTCAATTAG
```

# B

|                    |                                                                |
|--------------------|----------------------------------------------------------------|
| <i>C. elegans</i>  | MNT-PVKAKRQR-QQMPGTPIPMGRQTHRAHSASGFYTPHVSKLKTNYDREFQKFLRSAK   |
| <i>C. briggsae</i> | MIT-PEKPKRSRLQQPGTPIPTSRRRDDLVDLNI PAVYNPPVSKLKKNYDLEFGRFLRSAK |
| <i>C. remanei</i>  | MST-PVQVKRSR-NQQPGTPIPSRRREPSSLTAAVYNPPVSKLKKNYDQEFDRFLRSAK    |
| <i>C. brenneri</i> | MNT-PVKVKRSR-QNQGTPIPATRRRHIA SPVETVYNPPVLK LKKNYDVEFERFLQSAK  |
| <i>C. japonica</i> | MNTSPAKVKRAR-QEHLDTPI PAPS RKQRKMSLMGVYNPSVTRLKRTYSLEFGKFLKSLK |
