# Supplementary material for: HAL-2 Promotes Homologous Pairing during Caenorhabditis elegans Meiosis by Antagonizing Inhibitory Effects of Synaptonemal Complex Precursors
Source: PubMed Central journal article supplement (PMC3415444; doi:10.1371/journal.pgen.1002880), 2012-08-09

SUN-1 S8-Pi

wt

transition zone

*hal-2*

no transition zone

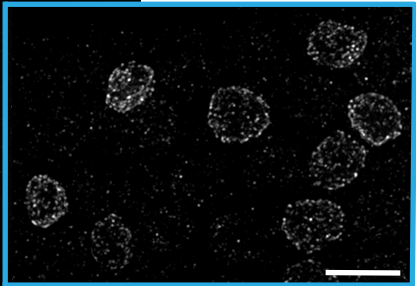

*syp-2*

transition zone

*hal-2; syp-2*

transition zone

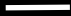

Supplement: pgen.1002880.s010.pdf [file pgen.1002880.s010.pdf]
